1 SARS-CoV-2 induces acute neurological signs while Calcitonin Gene-Related Peptide (CGRP)  
2 signaling blockade reduces interleukin 6 (IL-6) release and weight loss in mouse models.

3

4 Shorter title: SARS-CoV-2 induces acute neurological signs while CGRP signaling blockade  
5 reduces interleukin 6 (IL-6) release and weight loss

6

7 Shafaqat.M. Rahman <sup>1,co</sup>, David W. Buchholz<sup>2,co</sup>, Brian Imbiakha.<sup>2,co</sup>, Mason.C. Jager<sup>3</sup>, Justin  
8 Leach, <sup>1</sup>, Raven.M. Osborn <sup>1</sup>, Ann O. Birmingham <sup>1</sup>, Stephen Dewhurst<sup>1</sup>, Hector C. Aguilar<sup>2,\*</sup> ,  
9 and Anne E. Luebke, <sup>1,\*</sup>

10

11 <sup>1</sup>University of Rochester Medical Center, Departments of Biomedical Engineering,  
12 Neuroscience, Microbiology and Immunology, Rochester, NY, USA;

13 <sup>2</sup> Cornell University, Department of Microbiology and Immunology, College of Veterinary  
14 Medicine, Ithaca, NY, USA.

15 <sup>3</sup> Cornell University, Department of Population Medicine, College of Veterinary Medicine, Ithaca,  
16 NY, USA.

17 <sup>co</sup> Contributed equally

18 \*Send correspondence to: Anne E. Luebke ([aluebke@ur.rochester.edu](mailto:aluebke@ur.rochester.edu)) or Hector C. Aguilar  
19 ([haguilar@cornell.edu](mailto:haguilar@cornell.edu))

20 Submitting author: Anne E. Luebke ([aluebke@ur.rochester.edu](mailto:aluebke@ur.rochester.edu))

21

22

23 **Abstract:**

24 COVID-19 can result in neurological symptoms such as fever, headache, dizziness, and  
25 nausea. We evaluated whether the Calcitonin Gene-Related Peptide (CGRP) receptor  
26 antagonist, olcegepant, used in migraine treatment could mitigate acute neuroinflammatory and  
27 neurological responses to SARS-COV-2 infection. We infected wildtype C57BL/6J and  
28 129/SvEv mice, and a 129  $\alpha$ CGRP-null mouse line with a mouse-adapted SARS-CoV-2 virus,  
29 and evaluated the effect of CGRP receptor antagonism on the outcome of that infection. We  
30 determined that CGRP receptor antagonism provided protection from permanent weight loss in  
31 older (>12 m) C57BL/6J and 129 SvEv mice. We also observed acute fever and motion-  
32 induced dizziness in all older mice, regardless of treatment. However, in both wildtype mouse  
33 lines, CGRP antagonism reduced acute interleukin 6 (IL-6) levels by half, with virtually no IL-6  
34 release in mice lacking  $\alpha$ CGRP. These findings suggest that blockage of CGRP signaling  
35 protects against acute IL-6 release and subsequent inflammatory events after SARS-CoV-2  
36 infection.

37

38

39 **Introduction**

40 Coronavirus disease (COVID-19) caused by severe acute respiratory syndrome CoV-2 (SARS-  
41 CoV-2) has caused a 3-year, ongoing, world pandemic [1]. There is a sound premise  
42 supporting testing CGRP-receptor antagonists such as olcegepant as a way to mitigate the  
43 neuroimmune consequences of SARS-CoV-2 infection [2]. While CGRP has pleotropic effects  
44 on the immune system, CGRP release occurs as a result of SARS-CoV-2 activation of the  
45 transient receptor potential (TRP) channels; and is implicated in COVID-19 neurological  
46 symptoms such as fever, headache, dizziness, nausea pain, and the subsequent release of  
47 interleukin 6 (IL-6) [3-5]. IL-6 is an important mediator of inflammation that is often elevated in  
48 severe COVID-19 infection, and may be involved in the hyperimmune response cascade  
49 (cytokine storm) and the polarization of T-cell responses [6, 7]. Headache, nausea, and  
50 dizziness are common neurological manifestations of COVID-19 infection [8, 9] and in COVID-  
51 19 patients headache severity has been correlated with IL-6 levels [10, 11].

52  
53 Studies have shown that both SARS-CoV-1 (2002 outbreak) and SARS-CoV-2 (2019 outbreak)  
54 enter the body by binding to the angiotensin-converting enzyme 2 (ACE2) cell receptor [12, 13].  
55 However, due to sequence and structural differences between mouse ACE2 and human ACE2,  
56 human SARS coronaviruses exhibit a species-restricted tropism and are inefficient at infecting  
57 wild-type mice. To overcome this obstacle, the Baric laboratory modified the clinical SARS-  
58 CoV-2/USA-WA1 variant to gain the ability to bind to the murine ACE2 receptor after serial  
59 passaging in mice, to generate the MA10-SARS-CoV-2 virus [14, 15]; we used this mouse-  
60 adapted virus in most of our study.

61  
62 We first assessed both neurological symptoms of fever and dizziness/nausea in mouse models  
63 after infection with the MA10-SARS-CoV-2 virus. As a readout of the nausea-like state present  
64 after SARS-CoV-2 infection, we examined hypothermic responses to provocative motion, as we  
65 have previously used to assess migraine nausea pain (Biorxiv

66 doi.org/10.1101/2022.06.03.494762). Studies have demonstrated that provocative motion  
67 causes robust and prominent hypothermic responses in rats, humans, house musk shrews, and  
68 mice. These decreases in body temperature can represent a biomarker of a nausea-like state in  
69 laboratory animals as: i) temperature changes are provoked both by motion and by chemical  
70 emetic stimuli, ii) differential pharmacological sensitivity of these responses mirrors sensitivity in  
71 humans, iii) motion-induced hypothermia *precedes* emetic (vomiting) episodes, and iv) there is a  
72 clear parallel in hypothermic responses between animals and humans in underlying  
73 physiological mechanism - cutaneous vasodilatation that favors heat loss [16-21]. In the  
74 nausea/dizziness assay after provocative motion there is a decrease in head temperature and  
75 an increase in tail temperature. We have shown that in wildtype C57BL/6Jmice injection of  
76 Calcitonin Gene-Related Peptide (CGRP) prolongs this head temperature response and blunts  
77 the transient tail temperature increase, whereas a CGRP-receptor antagonist can reverse these  
78 CGRP-induced changes [22, 23] and [Biorxiv doi.org/10.1101/2022.06.03.494762](https://doi.org/10.1101/2022.06.03.494762). Therefore,  
79 we investigated if a MA10-SARS-CoV-2 viral infection would show similar acute  
80 dizziness/nausea responses as CGRP injection, and if antagonizing CGRP signaling could  
81 reduce these dizziness/nausea responses.  
82

## 83 **Results**

### 84 **MA-10 SARS-CoV-2 infection induces a fever-like state and disrupts**

85 **thermoregulation to provocative motion.** We measured baseline head temperatures in 18  
86 month-old male /6J, 129SvEv, and 129  $\alpha$ CGRP-null groups of mice during pretesting and 3  
87 days post-infection (dpi) with  $10^5$  pfu of MA-10 SARS-CoV-2 virus (**Fig. 2A&B**). Our results  
88 showed a higher head temperature at 3 dpi, indicating a fever in all mice, regardless of strain  
89 and olcegepant pretreatment (**Fig. 2B**).

90 We also measured motion-induced thermoregulation and weight changes in 18 month-  
91 old male C57BL/6J, 129SvEv, and 129  $\alpha$ CGRP-null groups of mice at 3 dpi with  $10^5$  pfu of MA-  
92 10 SARS-CoV-2 virus (**Fig. 3A**). Motion-induced thermoregulation was pre-tested in each  
93 mouse 5-7 days prior to the infection. During the pre-test, we observed transient tail vasodilation  
94 in response to provocative, nauseating stimuli (**Fig 3B,C,D**). The assay involved a 5-minute  
95 baseline recording, a 20-minute rotation period (75 rpm, 1 cm orbital displacement), and a 20-  
96 minute recovery period (as shown in **Figs. 1B and 3A**). Tail temperature profiles also indicated  
97 a fever-like state after infection with MA-10 SARS-CoV-2, with higher tail temperatures at all  
98 time points during the 3 dpi test than during the pretest (**Fig. 3B,C,D**). We computed a shift in  
99 the  $\Delta$  tail vasodilations by subtracting the magnitude of  $\Delta$  tail vasodilations at 3 dpi from an  
100 animal's pretest  $\Delta$  tail vasodilation. With the exception of infected  $\alpha$ CGRP-null mice, we  
101 observed a decrease in the magnitude of tail vasodilations in infected mice compared to their  
102 pretest, as indicated by a negative change in the  $\Delta$  tail vasodilation - which is a sign of less  
103 severe dizziness.

104 Typically, a twenty-minute provocative rotation in mice causes observable hypothermia,  
105 and an additional 20-minute recovery period is needed for the mice to recover to their baseline  
106 head temperature. Interestingly, we observed that viral infection delayed this recovery period, as  
107 seen in our raw data (**Fig. 3 E,F,G**). Using a second-order polynomial fit ( $B_0 + B_1X + B_2X^2$ ), we  
108 estimated the time required for the mice to recover back to their baseline head temperature by

109 interpolating a curve fit to  $t = 50$  minutes (**Fig. 3H**). We then computed a  $\Delta$  head recovery by  
110 subtracting the recovery period at 3 dpi from the pretest, where a positive  $\Delta$  head recovery  
111 indicated a longer recovery period due to the infection. In all infected males, regardless of  
112 olcegepant treatment or strain, we observed a longer recovery period at 3 dpi ( $p < 0.0001$ ). No  
113 protective effects were seen by olcegepant in head temperature recovery for either strain (**Fig.**  
114 **3H**).

115

### 116 **Olcegepant blockage or developmental loss of CGRP receptor leads to reduced IL-6** 117 **production in response to MA-10 infection**

118 SARS-CoV-2 infected 129/SvEv mice treated with olcegepant pellets had lower  
119 interleukin 6 (IL-6) concentrations in their bronchoalveolar lavage (BAL) as compared to mice  
120 treated with placebo (**Fig. 4B**). Congruently, the lower IL-6 concentrations in olcegepant-treated  
121 mice were similar to the IL-6 concentrations measured in the  $\alpha$ CGRP-null (-/-) mice (**Fig 4B**),  
122 which is consistent with the relationship between CGRP and IL-6 levels in migraines [24]. In  
123 C57BL/6J mice, similar observations regarding olcegepant's effects in reducing IL-6 post-  
124 infection were observed but did not reach statistical significance (**Fig 4A**).

### 125 **Older mice treated with olcegepant recovered from the initial weight loss by 7 dpi.**

126 When 18-month-old C57 or 129S mice were infected with MA-10, those pretreated with  
127 olcegepant pellets showed a faster recovery to baseline weight compared to mice that received  
128 placebo pellets. This effect was observed in both female and male C57BL/6J mice (**Fig. 5A**), as  
129 well as in older female and male 129SvEv mice (**Fig. 5B**). Notably, 129S  $\alpha$ CGRP (-/-) null mice  
130 of either sex experienced similar trends as 129S WT mice given olcegepant (**Fig. 5E**). Older  
131 infected mice exhibited lower core temperatures compared to the uninfected groups; however,  
132 olcegepant had no distinguishable effect on core temperatures regardless of age or strain (**Fig.**  
133 **5 B,D,F**). In addition, MA-10 infection did not significantly impact  $O_2\%$  saturation in mice

134 regardless of age, sex, or strain. However  $\alpha$ CGRP-null mice exhibited lower weight loss trends  
135 following virus infection that did WT mice - suggesting that the  $\alpha$ CGRP-null mice have a  
136 reduced sensitivity to the MA-10 virus.

137           Histological analysis of lung tissue revealed no significant differences in the number of  
138 SARS-CoV-2 infected cells in the lungs of C57BL/6J or 129S WT mice at 3 dpi (**Fig. 6 A&B**).  
139 However, olcegepant-protected mice and  $\alpha$ CGRP-null mice showed reduced staining for SARS-  
140 CoV-2 when compared to placebo-treated mice, and this observation correlated with IL-6 levels.  
141 **Fig. 6 C&D** shows SARS-CoV-2 staining (scale = 100  $\mu$ m) of C57BL/6J (**C**) and 129S (**D**) lung  
142 tissues.

143

144

145 **Discussion:**

146 Early in the pandemic, there was a controversy as to whether CGRP plasma levels were  
147 increased or decreased in COVID-19 disease [25, 26]. However, a recent study with a relatively  
148 greater number of patients showed that elevated CGRP plasma levels are correlated with  
149 increased disease severity in hospitalized COVID-19 patients [27]. In our study, the migraine  
150 drug olcegepant (small molecule CGRP receptor antagonist) reduced IL-6 release at three days  
151 post-infection (3 dpi) in two distinct wildtype mouse strains (C57B6 and 129S). Interestingly  
152 however, there was not a similar protective effect on fever or on the dizziness/nausea-like state  
153 elicited by SARS-CoV-2 MA-10 in these same infected mice, as tested at 3 dpi.

154 A few studies have investigated CGRP antagonism on individuals infected with SARS-  
155 CoV-2. In one study [28], no deleterious effects of CGRP antagonism were found, and no  
156 differences in symptom severity were found between CGRP antagonism to other treatment  
157 modalities in migraine subjects. However, in this study, patients were not stratified by age. We  
158 observed CGRP antagonism was protective from weight loss and IL-6 release only in older  
159 mice. COVID-19 symptoms are more severe and mortality rates are higher in aged human  
160 patients, adding significance to our results. Further, two relatively recent case studies showed  
161 that increased headaches after SARS-CoV-2 infection can be treated with CGRP monoclonal  
162 antibodies [29, 30]. Our study suggests that olcegepant or other CGRP treatments may be  
163 further explored particularly to treat headaches or migraines in aged individuals and/or those  
164 with high IL-6 levels upon COVID-19 infection.

165 In conclusion, in addition to the acute effects studied here, antagonizing CGRP signaling  
166 may be therapeutic against long COVID, as long COVID patients also show higher IL-6 plasma  
167 levels [31]. As long COVID has been demonstrated in mouse models [32], future plans include  
168 investigating if antagonizing CGRP signaling in preclinical models can mitigate neurological long  
169 COVID symptoms.

170



171 **Materials and Methods**

172 **Animals**

173 A total of 180 mice (120 M/60F) were used in these studies, either 129SvEv (Taconic  
174 129SVE) or C57B6/J (JAX 0664) or  $\alpha$ CGRP (-/-) null mice on a 129SvEv background. Prior to  
175 SARS-CoV-2 infection, mice were bred and housed under a 12 to 12 day/night cycle at the  
176 University of Rochester 's Vivarium under the care of the University of Rochester's Veterinary  
177 Services personnel. Mice were implanted with transponder chips (Backagin Microchip FDX-B  
178 ISO 11784/11785) to allow for blinded identification; and when relevant, implanted with pellets  
179 containing placebo or olcegepant (BIBN4096, Tocris; 2 mg/kg/day/SQ; Innovative Research of  
180 America, Inc.). After pretesting was performed, mice were transferred to Cornell's ABSL3  
181 facility, and acclimated prior to virus infection and testing. All animal procedures were approved  
182 both by the University of Rochester's and Cornell University's IACUC committees and  
183 performed in accordance with NIH standards.

184

185 **Virus propagation**

186 Vero-E6 cells (obtained through BEI resources, NIAID, NIH, NR-53726) were cultured in  
187 Eagle's Minimum Essential Medium (ATCC, #30-2003) supplemented with 10% (vol/vol) fetal  
188 bovine serum (FBS) (Gibco, CA) and 1% penicillin-streptomycin (Pen-Strep, Life Technologies)  
189 at 37°C in a 5% (vol/vol) CO<sub>2</sub> atmosphere. Viral stocks of mouse-adapted SARS-CoV-2 (MA10)  
190 (obtained from the laboratory Dr. Ralph Baric) were propagated in Vero-E6 cells in 2% (vol/vol)  
191 FBS and 1% penicillin-streptomycin at 37°C at a multiplicity of infection (MOI) of 0.1. Viral stock  
192 titers were determined by TCID<sub>50</sub> analysis. Viral propagation involving live SARS-CoV-2 was  
193 conducted in Biosafety level 3 (BSL3) facilities both at the University of Rochester and at  
194 Cornell University.

195

## 196 **Animal Biosafety level 3 (ABSL3) facility and viral inoculations**

197 Mice were anesthetized using isoflurane and subsequently intranasally infected with MA-  
198 10 SARS-CoV-2. For infection with live virus, drops of the pre-characterized viral stock were  
199 administered into the rostral meatus of the nose, with a total volume of 50  $\mu$ L per mouse. Daily  
200 monitoring and weighing of the mice were conducted until they reached a predetermined  
201 humane endpoint of 20% weight loss from their starting weight and/or severe clinical signs, at  
202 which point animals were humanely euthanized. Mouse studies were conducted in a BSL-3  
203 laboratory and in accordance with protocols approved by the Institutional Animal Care and Use  
204 Committee at Cornell University (IACUC mouse protocol # 2017-0108 and BSL3 IBC # MUA-  
205 16371-1). See Fig. 1A.

206

## 207 **Motion-Induced Thermoregulation Testing**

208 Tu et al. first noticed thermoregulatory changes in the temperatures of the heads,  
209 bodies, and tails of mice, in response to provocative motion [21] . We therefore adapted  
210 their protocol for the present study (Biorxiv doi.org/10.1101/2022.06.03.494762). Head and  
211 tail temperatures of C57B6/J mice were measured for a total of 45 minutes using a FLIR E60 IR  
212 camera (model: E64501), as depicted in Fig. 1A. This camera was connected to a tripod and  
213 positioned approximately 43 cm above an open, plexiglass box (mouse box) used to house an  
214 individual mouse during testing. Both the tripod and mouse box were securely attached to the  
215 shaker's base. Briefly, baseline measurements were recorded for five minutes prior to the  
216 provocative motion (-5 to 0 mins). The provocative motion was an orbital rotation (75 rpm, 2-cm  
217 orbital displacement), and mice were video-recorded for 20 minutes (0 to 20 mins). After 20  
218 minutes, the provocative motion was turned off, and mice were video-recorded for an additional  
219 20 minutes to measure recovery to baseline (20 to 40 mins) as schematized in Figs. 1A and 2.  
220 Head and tail temperatures were measured after data retrieval using the software FLIR Tools+.  
221 Tail and head temperatures were measured within predefined field of views: square region (3x3

222 mm) for tail, and circular region (10x10 mm) for head. Tail measurements occurred 2 cm from  
223 the base of the tail and head measurements occurred at the center of the head image, in  
224 between the mouse's ears. Infrared imaging data was collected every minute during baseline  
225 measurements, and every 2 minutes during and after the provocative motion. We quantified  
226 thermoregulatory changes to provocative motion by comparing changes in tail vasodilatations,  
227 and we approximated the magnitude of the head hypothermia based on second order curve fit  
228 estimates. Transient increases in the tail temperature of the mouse to provocative motion are  
229 referred to as  $\Delta$  *tail vasodilatations* ( $^{\circ}\text{C}$ ), and were computed by subtracting the tail temperature  
230 at time  $t = 0$  minutes (rotation ON) from the max tail temperature measured during the first 10  
231 mins of the rotation ( $0 \leq t \leq 10$ ).

232

### 233 **Pulse Oximetry**

234 A mouse Stat Jr X (Kent Scientific) was used to measure oxygen saturation ( $\text{O}_2\%$ ) of  
235 mice (see Fig. 1B). The  $\text{O}_2$  sensor was applied to the rear leg, and data were recorded following  
236 readout stabilization, defined as an unchanging recording over 5 seconds.

237

### 238 **BAL harvest and tissue processing**

239 Mice were euthanized with  $\text{CO}_2$ , and broncho-alveolar lavage BAL fluid was removed  
240 from the lung; animals then underwent laparotomy and sternotomy with subsequent left and  
241 right ventricular cardiac perfusion with 20 mL total of PBS. Lungs were treated with 4%  
242 paraformaldehyde/PBS (volume/volume) for a minimum of 72 hours to ensure full viral  
243 inactivation. Tissues were taken out of the BSL3 facility and underwent dehydration with ethanol  
244 and were later embedded in paraffin blocks for histological analysis.

245

## 246 **Histopathology**

247 For histological examination, mouse lungs were collected directly after euthanasia and  
248 placed in 10% neutral buffered formalin for 72 h, after which tissues were embedded in paraffin.  
249 Four-micrometer tissue sections were stained with hematoxylin for analysis.  
250 Immunohistochemistry and digital image analysis for SARS-CoV-2 nucleocapsid was performed  
251 as previously described [33]. Briefly, 4  $\mu$ m tissue sections were labeled with a rabbit IgG  
252 monoclonal antibody against SARS-CoV-2 nucleocapsid protein (GeneTex; GTX635679) at a  
253 1:5,000 dilution and processed using a Leica Bond Max automated IHC Stainer. Digital image  
254 analysis was performed using QuPath software v.0.2.3 [33-36].

255

## 256 **Imaging**

257 Histological specimens were visualized using a Zeiss Axioplan 2 microscope.  
258 Immunohistochemistry (IHC) and hematoxylin and eosin (HE) stained slides for each specimen  
259 were photographed in sequential order. In Adobe Photoshop, all images were sized with a  
260 2080x2080 pixel frame and cropped to a uniform resolution of 1500x1500 pixels. IHC images  
261 were further analyzed using Color Selection and Magic Wand tools where areas containing  
262 brown staining were manually selected and cut into a separate layer. All images were exported  
263 into JPEG format. For staining percentages, quantification was performed using ImageJ.  
264 Images were converted from RGB Color into 8-bit grayscale and made Binary to set an  
265 automated threshold. Area was then calculated with the Analyze Particles function. Circularity of  
266 staining was assessed using the Circularity parameter set to 0.9-1.0.

## 267 **Quantification of lavage cytokines by ELISA**

268 Immulux 4HBx plates (ThermoFisher Scientific, #3855) were coated with IL-6 capture  
269 antibody (ThermoFisher Scientific, MP5-20F3) and left overnight at 4°C. Wells were washed five  
270 times with PBS+0.05% Tween 20 and blocked with PBS+5% dry milk solution (Bio-Rad,

271 1706404) for 1 hour at room temperature. 50 $\mu$ L of lavage sample or standard (R&D systems,  
272 406-ML-005/CF) was added to the blocked wells for 2 hours at room temperature. Bound  
273 cytokine was detected using a biotinylated IL-6 detection antibody (ThermoFisher Scientific,  
274 MP5-32C11), streptavidin horseradish peroxidase (strep-HRP), and tetramethylbenzidine (TMB)  
275 (ThermoFisher Scientific, 34028). Wells were washed three times following the addition of  
276 detection antibody and strep-HRP. Reactions were stopped with 2N H<sub>2</sub>SO<sub>4</sub> and ODs were read  
277 at 450nm. Cytokine concentrations for each sample were determined by plotting OD values on a  
278 standard curve using IL-6 recombinant protein. All testing was performed in triplicate.

279

## 280 **Statistics**

281 Two-way mixed effects (ME) models were used to assess % weight loss, and core  
282 temperatures ( $^{\circ}$ C) across the factors: i) placebo vs olcegepant protection and ii) dpi. Two-way  
283 ME models were also used to assess: i) viral infection vs pretest and ii) placebo vs olcegepant  
284 protection for tail vasodilation responses at 3 dpi. Bonferroni multiple comparisons test was the  
285 preferred post-hoc analysis method. X-intercept analyses of head recovery (mins) were  
286 conducted assuming a quadratic model, least squares regression fitting, and constraints where  
287 the x-intercept must be greater than  $x = 20$  mins and the curve fit was approximated to  $x = 50$   
288 mins. Nested 1-way ANOVAs with Tukey post hoc was used to analyze BAL IL-6  
289 concentrations and H&E staining (positive SARS-CoV-2 cells per mm<sup>2</sup>).

290

## 291 **Acknowledgments**

292 This research is supported by a COVID-19 research supplement to NIH R01 DC017261  
293 (AEL). We would also like to thank Dr. Ralph S. Baric (UNC) for the MA-10 SARS CoV-2 virus  
294 stock, the BSL3 facility and staff in the Center for Advanced Research Technologies at the  
295 University of Rochester, and the ABSL3 facility and staff at Cornell University. We would also  
296 like to thank Shruti Aryal for assisting with data analysis.

297

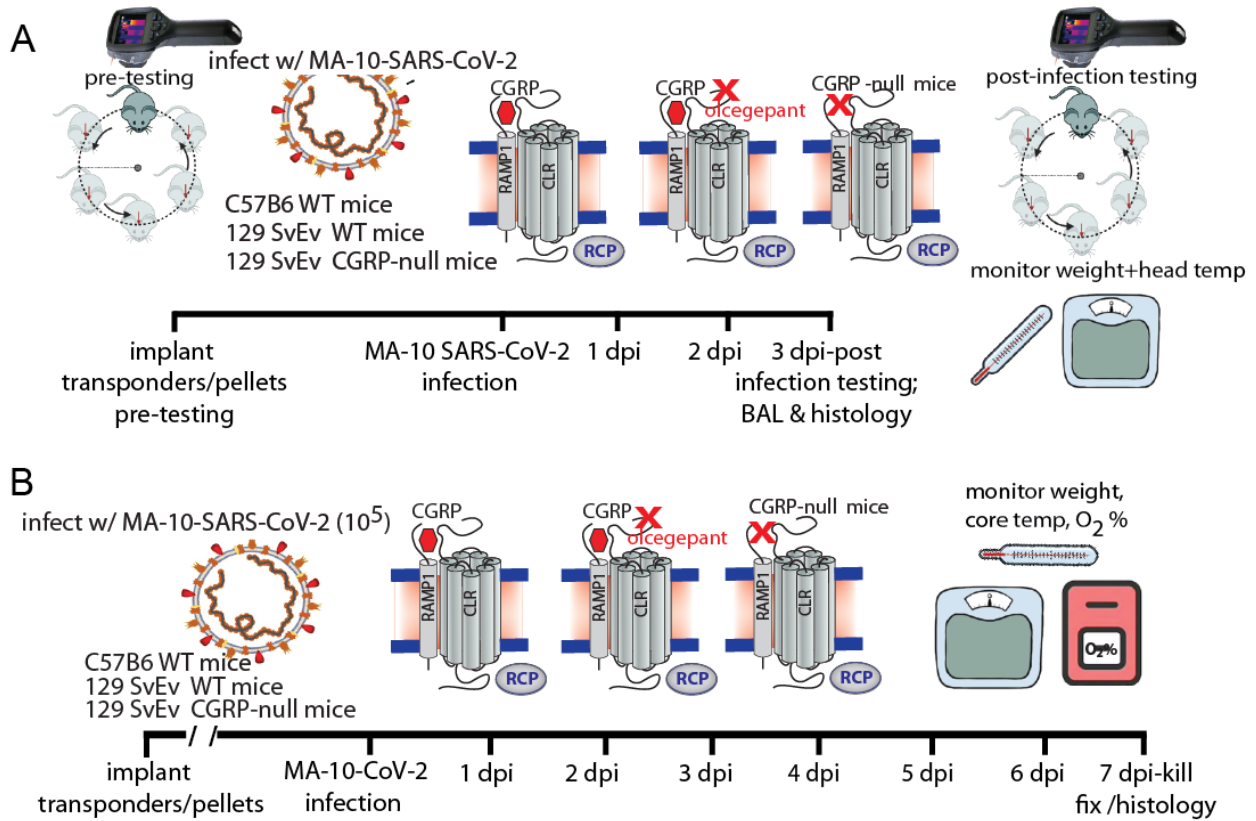

298

299 Fig. 1

300

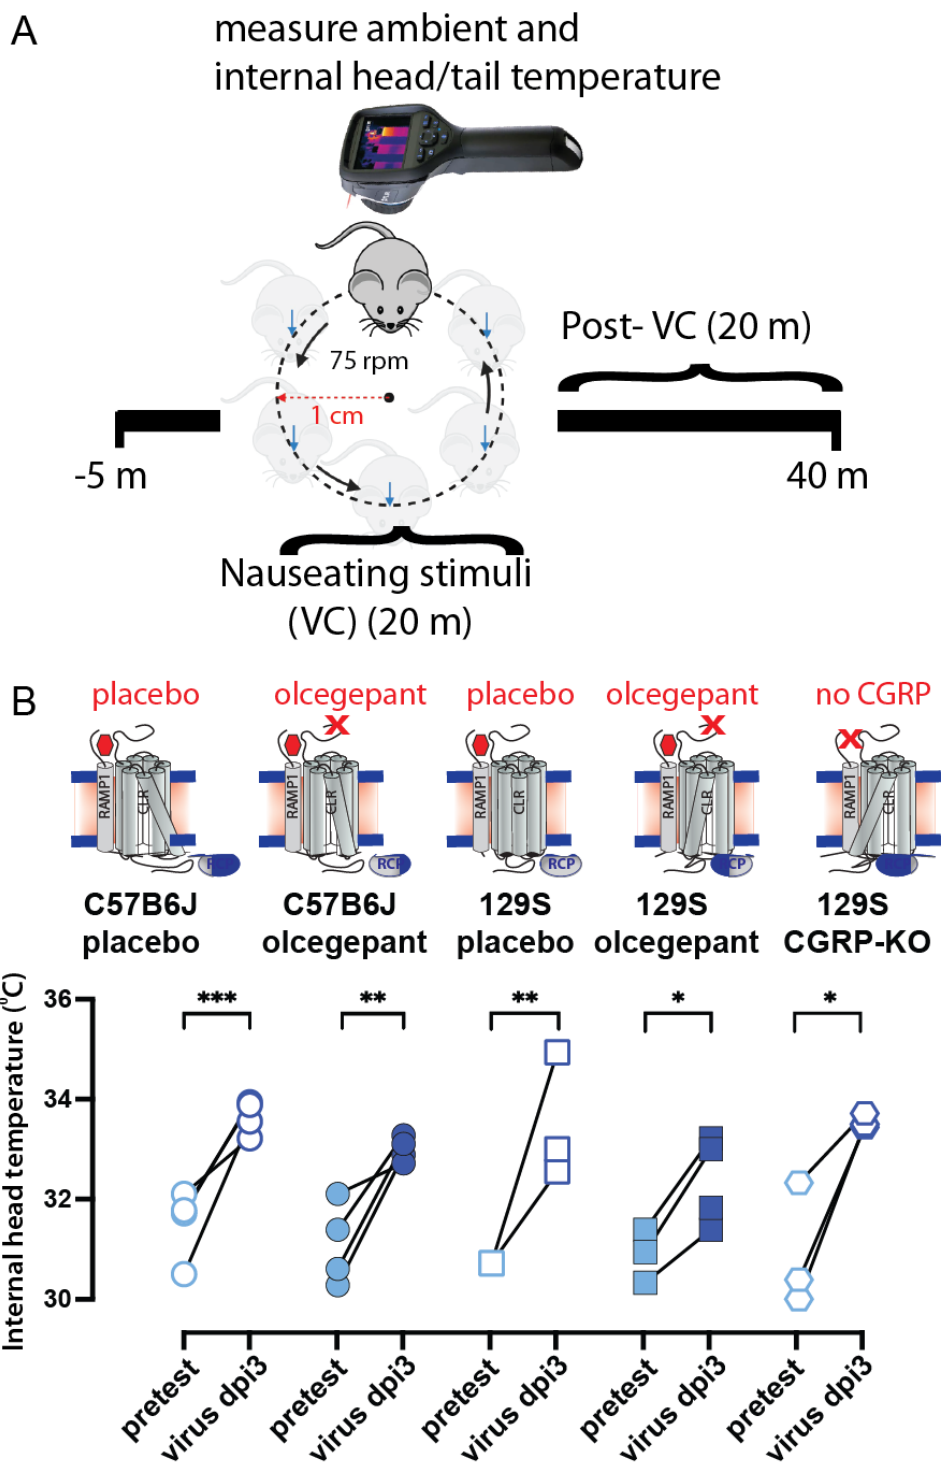

301

302 Fig. 2

303

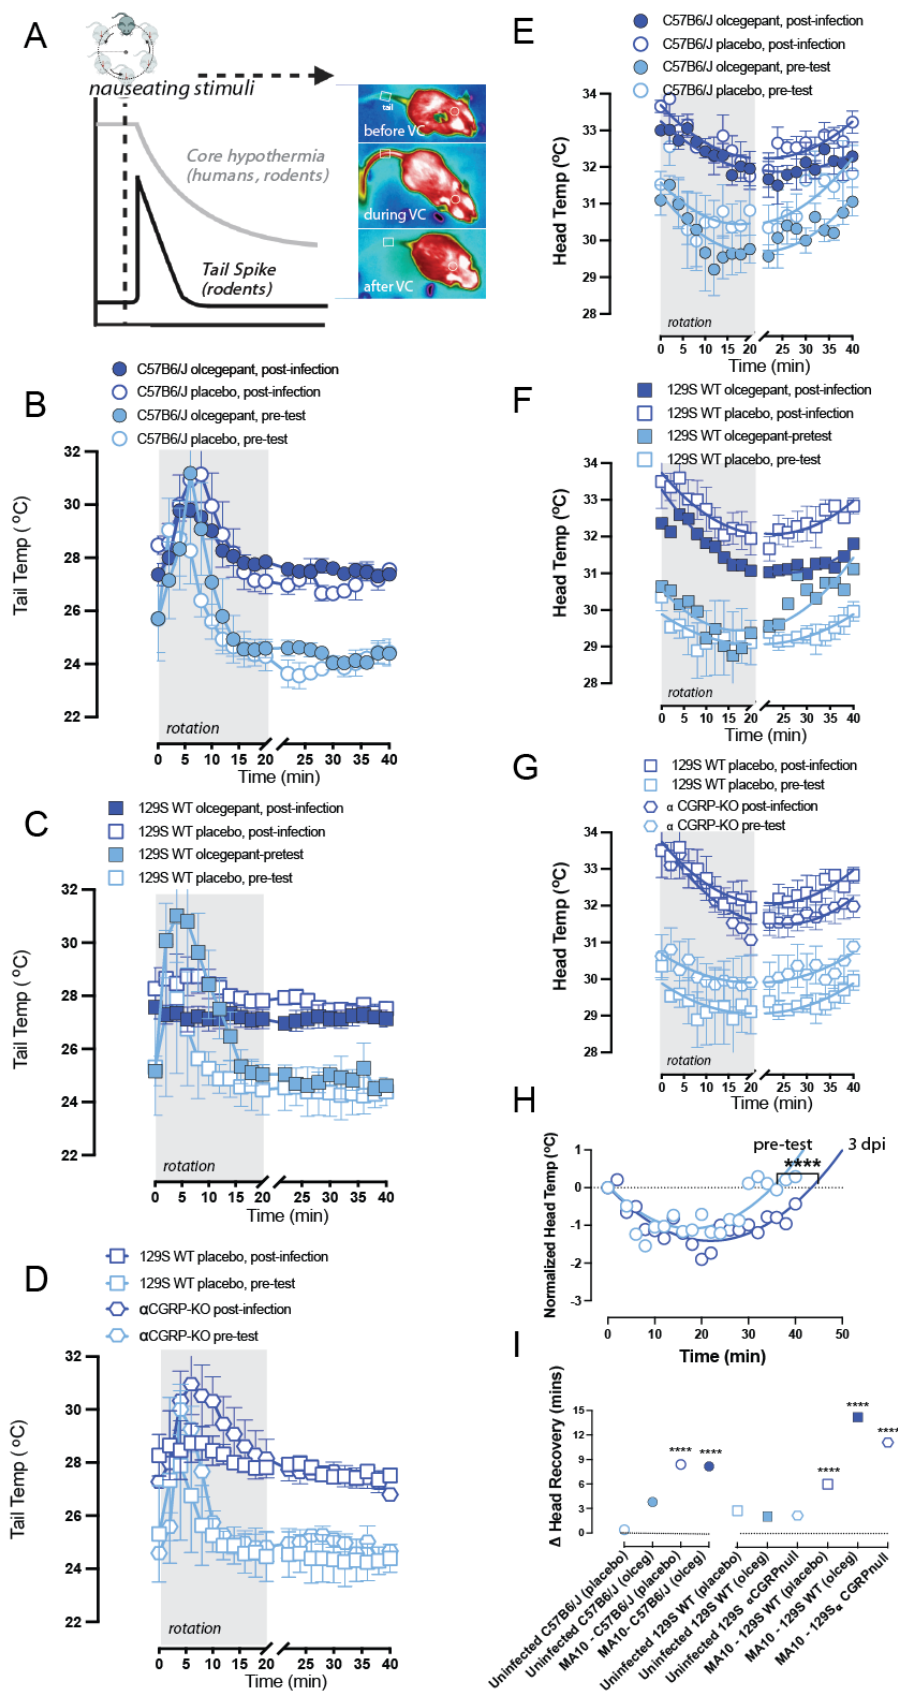

304

305 Fig. 3



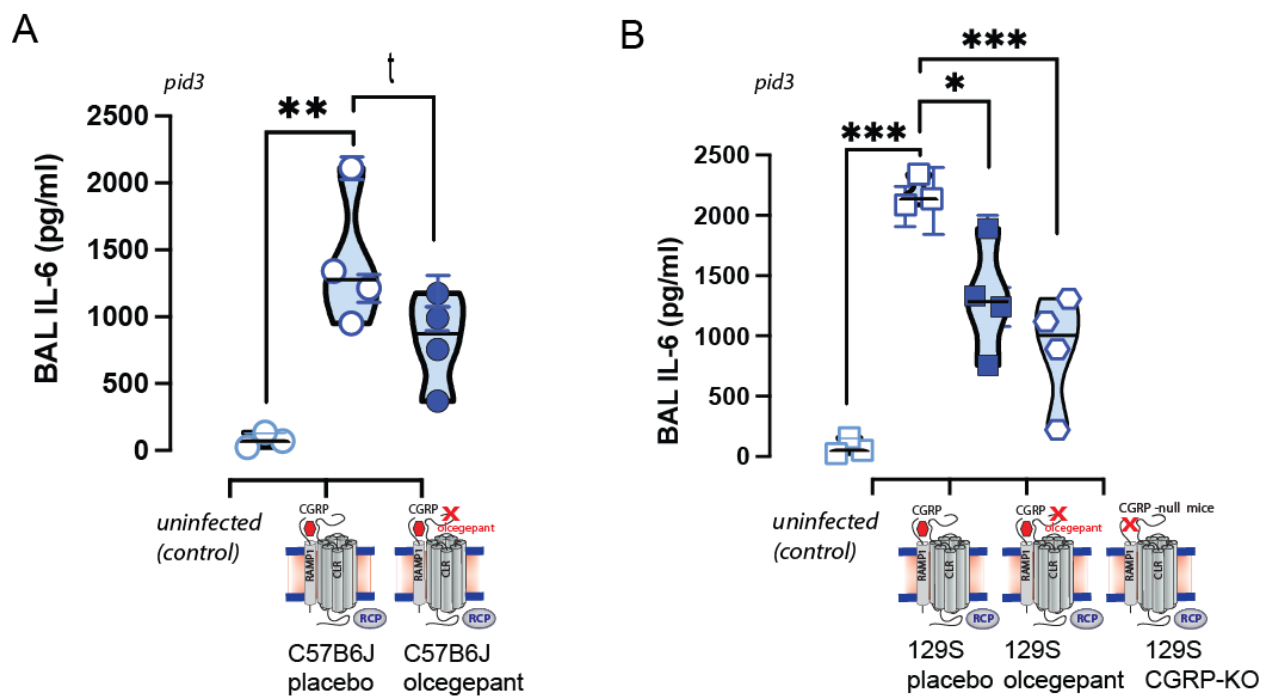

306

307 Fig. 4

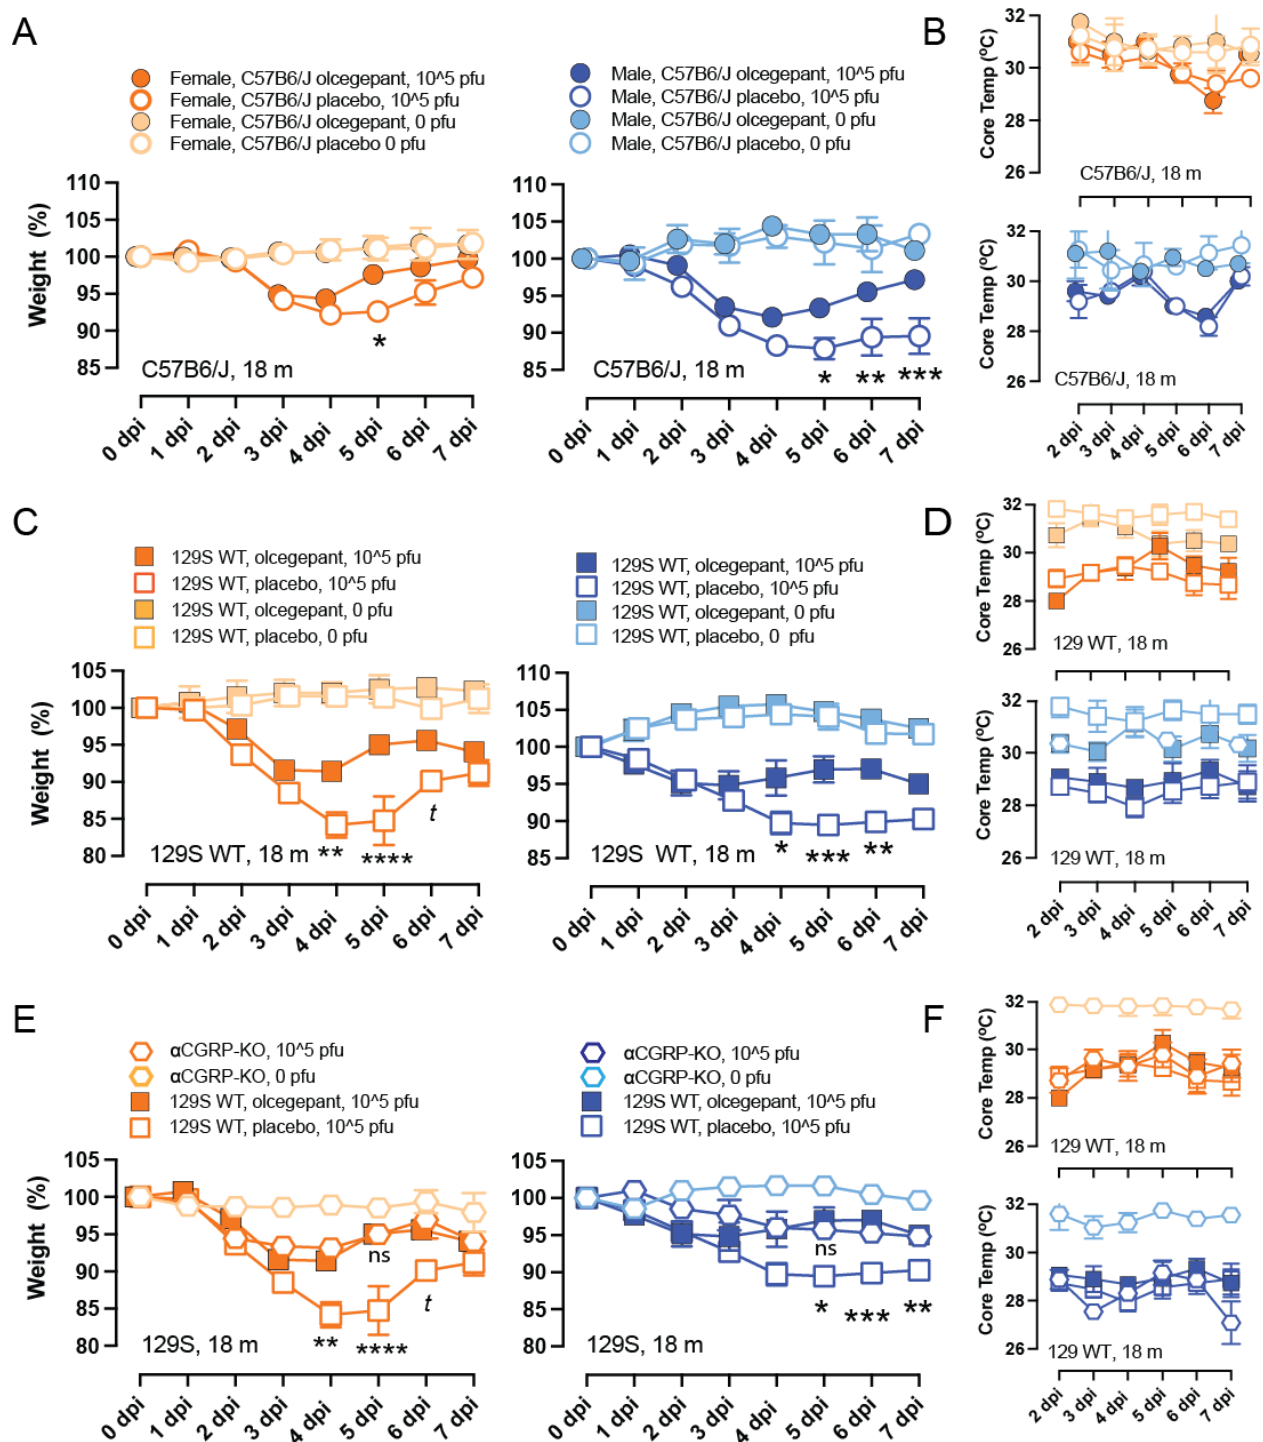

308  
309 Fig. 5

310

311

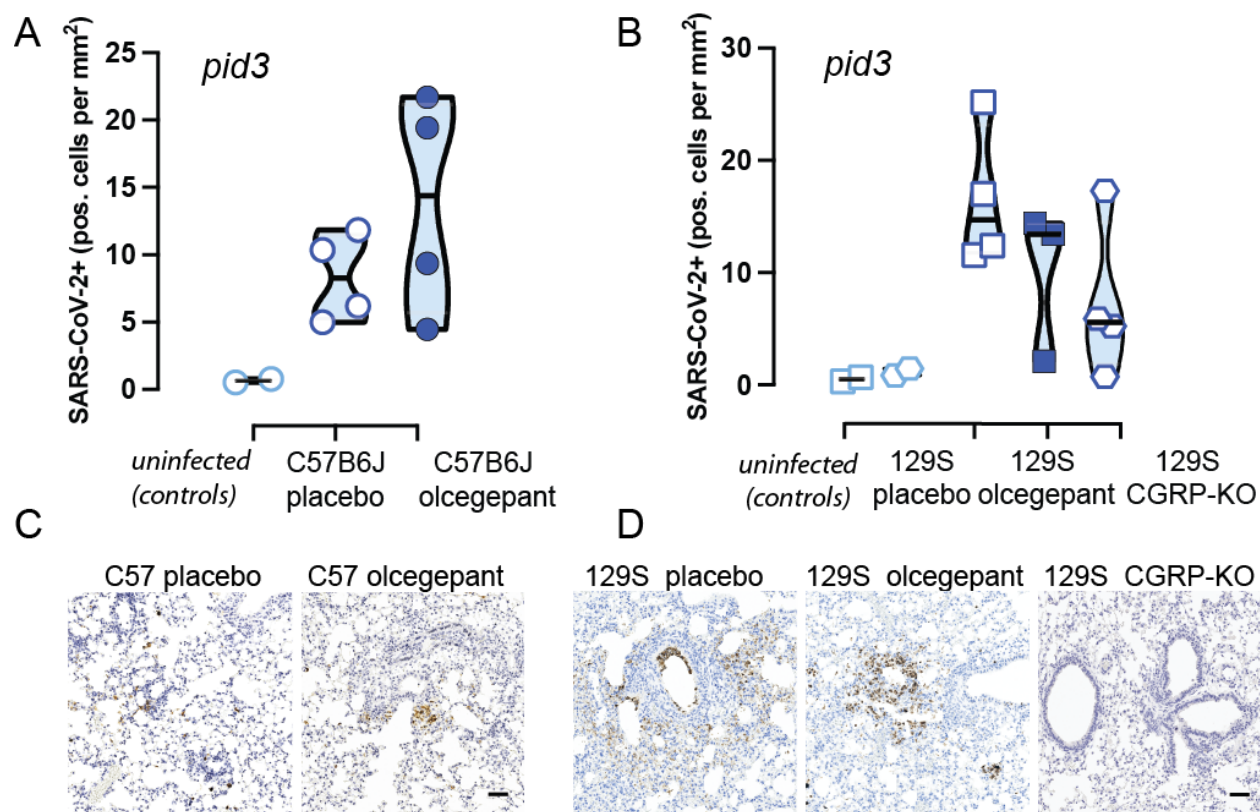

312

313

314

315 Fig. 6

316

317

318

319

320

321

322

323

324

325

326

327

328

329

330 **Figure Legends:**

331 **Fig. 1.** The study timelines are depicted. **A.** WT mice were infected with  $10^5$  pfu of MA-10  
332 SARS-CoV-2 in the presence of placebo or CGRP-receptor antagonist olcegepant slow-release  
333 pellets (olcegepant, BIBN4096, Tocris; 2 mg/kg/day/SQ) or mice lacking CGRP were infected  
334 with the same virus; animals were then assessed for motion-induced nausea (dizziness) at 3  
335 days after viral infection (dpi). At the completion of the nausea testing at 3dpi, bronchoalveolar  
336 lavage (BAL) samples were collected for ELISA and lung tissue was obtained from control and  
337 virus-infected animals at 3 dpi. Nausea (dizziness) was assessed for 45 minutes when mouse  
338 was subjected to an orbital motion, noting temperature profiles (head and tail). **B.** WT mice  
339 were infected with  $10^5$  pfu of MA-10 SARS-CoV-2 in the presence of placebo or CGRP-receptor  
340 antagonist olcegepant slow-release pellets (olcegepant, BIBN4096, Tocris; 2 mg/kg/day/SQ) or  
341 mice lacking CGRP were infected with the same virus; animals were then monitored for  
342 changed in weight, core temperature and oxygen ( $O_2$ ) saturation from 0 to 7 dpi.

343  
344 **Fig. 2.** As shown in the **Fig 1A** timeline, older C57B/6, 129SvEv, and 129 mice lacking CGRP  
345 were assessed for nausea (dizziness) when subjected to an orbital rotation, noting temperature  
346 profiles (head and tail). **A.** Head and tail temperatures of mice were measured for a total 45  
347 minutes using a FLIR E60 IR camera (model: E64501). This camera was connected to a tripod  
348 and positioned approximately 43 cm above an open, plexiglass box (mouse box) used to house  
349 an individual mouse during testing. Both the tripod and mouse box are securely attached to the  
350 shaker's base. Briefly, baseline measurements were recorded for five minutes prior to the  
351 provocative motion (-5 to 0 mins). The provocative motion was an orbital rotation (75 rpm, 2-cm  
352 orbital displacement), and mice were recorded for 20 minutes (0 to 20 mins). After 20 minutes,  
353 the provocative motion was turned off, and mice were recorded for an additional 20 minutes to  
354 measure recovery to baseline (20 to 40 mins). Three mouse strains were tested: C57/B6J WT,  
355 129S WT, and 129S  $\alpha$ CGRP-null mice. Within each wild type (WT) strain, four groups of mice  
356 were tested: placebo only, olcegepant only, placebo with  $10^5$  MA-SARS-CoV-2, and olcegepant

357 with  $10^5$  SARS-CoV-2 MA-10. Virus-infected mice were tested at Cornell University's ABSL-3  
358 environment, with all pre-infection testing performed at University of Rochester. **B.** All tested  
359 mice experienced a fever-like state 3 days post-viral infection (3 dpi). Olcegepant did not have a  
360 protective effect in reducing this acute fever-like state at 3 dpi.

361

362 **Fig. 3. A.** Upon provocative motion, humans and mice will show a drop in head temperature  
363 that recovers once rotation is ceased, and mice show a transient tail spike ~10 min into rotation.  
364 When nausea or dizziness is present, the head temperature drop takes longer to recover, and  
365 the transient tail spike diminishes or disappears. **B,C,D.** Viral infection diminishes tail  
366 vasodilatations and impairs a mouse's natural response to the provocative motion. At time  $t = 0$ ,  
367 mice experience a 20-minute provocative motion and exhibit a significant increase in tail  
368 temperature.  $\Delta$  tails are computed and are corrected for ambient temperature. Findings suggest  
369 that olcegepant did not protect against virus-induced changes in tail vasodilation at 3 dpi in all of  
370 the strains tested. **E,F,G.** Viral infection impacts recovery from hypothermia after provocative  
371 motion. **H.** Second order curve fits observed recovery of head temperatures after provocative  
372 motion to baseline. Across all strains, mice experienced delayed temperature recovery  
373 compared to pretest, with longer recovery profiles. **I.** No protective effects were seen by  
374 olcegepant in temperature recovery for any of the tested strains.

375

376

377 **Fig. 4.** Broncho-alveolar lavage (BAL) samples were obtained for ELISA testing, and lungs were  
378 obtained for subsequent immunohistochemistry at 3 dpi. MA-SARS-CoV-2 infection increased  
379 the release of the inflammatory cytokine IL-6, and this IL-6 release was attenuated by CGRP  
380 signaling blockade. In both C57B6/J (**A**) and 129S mice (**B**) strains, IL-6 release was  
381 attenuated by olcegepant SQ release. Moreover, in  $\alpha$ CGRP null mice, IL-6 cytokine release was  
382 statistically equivalent to non-infected controls (**B**).

383

384 **Fig. 5.** Older (18 months) female and male mice were tested for weight loss and core  
385 temperature drops after infection with MA-10 SARS-CoV-2,  $10^5$  pfu virus at 0-7 dpi. **A. C.** We  
386 found that animals treated with olcegepant recovered from the initial weight loss, with male mice  
387 showing increased protection. **A.** C57B6/J; **C.** 129S. **E.** Similar to the IL-6 findings (**Fig. 4**),  
388 mice lacking the CGRP peptide were not significantly different from uninfected controls. **B, D,**  
389 **F.** Viral infection caused core temperatures of mice to decrease, and this effect was unaltered  
390 by olcegepant treatment.

391

392 **Fig. 6. A&B.** There was no statistically significant difference in the number of SARS-CoV-2  
393 antigen-positive cells in the lungs of (**A, C**) C57/B6J or (**B, D**) 129 mice, between mice that  
394 received placebo versus olcegepant pellets at 3 dpi. **C, D.** Representative SARS-CoV-2  
395 immunostaining is shown for 3 dpi lung issues from C57B6/J (**C**), and 129S (**D**) mice. Scale bar  
396 is 100  $\mu\text{m}$ . (\*=  $p < 0.05$ , \*\* =  $p < 0.01$ , \*\*\* =  $p < 0.001$ , \*\*\*\* =  $p < 0.0001$ )

397

398 **References:**

- 399 1. Zhu N, Zhang D, Wang W, Li X, Yang B, Song J, et al. A Novel Coronavirus from  
400 Patients with Pneumonia in China, 2019. *N Engl J Med.* 2020;382(8):727-33. Epub 2020/01/25.  
401 doi: 10.1056/NEJMoa2001017. PubMed PMID: 31978945; PubMed Central PMCID:  
402 PMCPMC7092803.
- 403 2. Robertson CE. Could CGRP antagonists be helpful in the fight against COVID-19?  
404 Headache. 2020. Epub 2020/05/10. doi: 10.1111/head.13853. PubMed PMID: 32386433.
- 405 3. Assas BM, Miyan JA, Pennock JL. Cross-talk between neural and immune receptors  
406 provides a potential mechanism of homeostatic regulation in the gut mucosa. *Mucosal Immunol.*  
407 2014;7(6):1283-9. Epub 2014/09/04. doi: 10.1038/mi.2014.80. PubMed PMID: 25183366.
- 408 4. Assas BM, Pennock JL, Miyan JA. Calcitonin gene-related peptide is a key  
409 neurotransmitter in the neuro-immune axis. *Front Neurosci.* 2014;8:23. Epub 2014/03/05. doi:  
410 10.3389/fnins.2014.00023. PubMed PMID: 24592205; PubMed Central PMCID:  
411 PMCPMC3924554.
- 412 5. Channappanavar R, Perlman S. Pathogenic human coronavirus infections: causes and  
413 consequences of cytokine storm and immunopathology. *Semin Immunopathol.* 2017;39(5):529-  
414 39. Epub 2017/05/04. doi: 10.1007/s00281-017-0629-x. PubMed PMID: 28466096; PubMed  
415 Central PMCID: PMCPMC7079893.
- 416 6. Aghagoli G, Gallo Marin B, Katchur NJ, Chaves-Sell F, Asaad WF, Murphy SA.  
417 Neurological Involvement in COVID-19 and Potential Mechanisms: A Review. *Neurocrit Care.*  
418 2021;34(3):1062-71. Epub 2020/07/15. doi: 10.1007/s12028-020-01049-4. PubMed PMID:  
419 32661794; PubMed Central PMCID: PMCPMC7358290.
- 420 7. Liu Y, Zhang C, Huang F, Yang Y, Wang F, Yuan J, et al. Elevated plasma levels of  
421 selective cytokines in COVID-19 patients reflect viral load and lung injury. *Natl Sci Rev.*

- 422 2020;7(6):1003-11. Epub 2020/06/01. doi: 10.1093/nsr/nwaa037. PubMed PMID: 34676126;  
423 PubMed Central PMCID: PMCPMC7107806.
- 424 8. Bohn MK, Hall A, Sepiashvili L, Jung B, Steele S, Adeli K. Pathophysiology of COVID-  
425 19: Mechanisms Underlying Disease Severity and Progression. *Physiology* (Bethesda).  
426 2020;35(5):288-301. Epub 2020/08/14. doi: 10.1152/physiol.00019.2020. PubMed PMID:  
427 32783610; PubMed Central PMCID: PMCPMC7426542.
- 428 9. Saniasiaya J, Kulasegarah J. Dizziness and COVID-19. *Ear Nose Throat J*.  
429 2021;100(1):29-30. Epub 2020/09/16. doi: 10.1177/0145561320959573. PubMed PMID:  
430 32931322; PubMed Central PMCID: PMCPMC7492824.
- 431 10. Bolay H, Karadas O, Ozturk B, Sonkaya R, Tasdelen B, Bulut TDS, et al. HMGB1,  
432 NLRP3, IL-6 and ACE2 levels are elevated in COVID-19 with headache: a window to the  
433 infection-related headache mechanism. *J Headache Pain*. 2021;22(1):94. Epub 2021/08/14. doi:  
434 10.1186/s10194-021-01306-7. PubMed PMID: 34384355; PubMed Central PMCID:  
435 PMCPMC8358545.
- 436 11. Karadas O, Ozturk B, Sonkaya AR, Tasdelen B, Ozge A, Bolay H. Latent class cluster  
437 analysis identified hidden headache phenotypes in COVID-19: impact of pulmonary infiltration  
438 and IL-6. *Neurol Sci*. 2021;42(5):1665-73. Epub 2021/02/10. doi: 10.1007/s10072-020-04978-2.  
439 PubMed PMID: 33559789; PubMed Central PMCID: PMCPMC7870778.
- 440 12. Kuba K, Imai Y, Rao S, Gao H, Guo F, Guan B, et al. A crucial role of angiotensin  
441 converting enzyme 2 (ACE2) in SARS coronavirus-induced lung injury. *Nat Med*.  
442 2005;11(8):875-9. Epub 2005/07/12. doi: 10.1038/nm1267. PubMed PMID: 16007097; PubMed  
443 Central PMCID: PMCPMC7095783.
- 444 13. Ziegler CGK, Allon SJ, Nyquist SK, Mbanjo IM, Miao VN, Tzouanas CN, et al. SARS-  
445 CoV-2 Receptor ACE2 Is an Interferon-Stimulated Gene in Human Airway Epithelial Cells and Is



- 446 Detected in Specific Cell Subsets across Tissues. *Cell*. 2020. Epub 2020/05/16. doi:  
447 10.1016/j.cell.2020.04.035. PubMed PMID: 32413319.
- 448 14. Dinnon KH, 3rd, Leist SR, Schafer A, Edwards CE, Martinez DR, Montgomery SA, et al.  
449 A mouse-adapted model of SARS-CoV-2 to test COVID-19 countermeasures. *Nature*.  
450 2020;586(7830):560-6. Epub 2020/08/28. doi: 10.1038/s41586-020-2708-8. PubMed PMID:  
451 32854108; PubMed Central PMCID: PMCPMC8034761.
- 452 15. Dinnon KH, 3rd, Leist SR, Schafer A, Edwards CE, Martinez DR, Montgomery SA, et al.  
453 Publisher Correction: A mouse-adapted model of SARS-CoV-2 to test COVID-19  
454 countermeasures. *Nature*. 2021;590(7844):E22. Epub 2021/01/21. doi: 10.1038/s41586-020-  
455 03107-5. PubMed PMID: 33469219.
- 456 16. Del Vecchio F, Nalivaiko E, Cerri M, Luppi M, Amici R. Provocative motion causes fall in  
457 brain temperature and affects sleep in rats. *Exp Brain Res*. 2014;232(8):2591-9. doi:  
458 10.1007/s00221-014-3899-8. PubMed PMID: 24658633.
- 459 17. Mazloumi Gavgani A, Hodgson DM, Nalivaiko E. Effects of visual flow direction on signs  
460 and symptoms of cybersickness. *PLoS One*. 2017;12(8):e0182790. doi:  
461 10.1371/journal.pone.0182790. PubMed PMID: 28777827; PubMed Central PMCID:  
462 PMCPMC5544223.
- 463 18. Nalivaiko E, Rudd JA, So RH. Motion sickness, nausea and thermoregulation: The  
464 "toxic" hypothesis. *Temperature (Austin)*. 2014;1(3):164-71. doi:  
465 10.4161/23328940.2014.982047. PubMed PMID: 27626043; PubMed Central PMCID:  
466 PMCPMC5008705.
- 467 19. Ngampramuan S, Cerri M, Del Vecchio F, Corrigan JJ, Kamphee A, Dragic AS, et al.  
468 Thermoregulatory correlates of nausea in rats and musk shrews. *Oncotarget*. 2014;5(6):1565-

- 469 75. doi: 10.18632/oncotarget.1732. PubMed PMID: 24728971; PubMed Central PMCID:  
470 PMCPMC4039232.
- 471 20. Romano F, Caramia N, Straumann D, Nalivaiko E, Bertolini G. Cross-coupling vestibular  
472 stimulation: motion sickness and the vestibulo-sympathetic reflex. *J Neurol*. 2017. doi:  
473 10.1007/s00415-017-8496-x. PubMed PMID: 28455665.
- 474 21. Tu L, Poppi L, Rudd J, Cresswell ET, Smith DW, Brichta A, et al. Alpha-9 nicotinic  
475 acetylcholine receptors mediate hypothermic responses elicited by provocative motion in mice.  
476 *Physiol Behav*. 2017;174:114-9. doi: 10.1016/j.physbeh.2017.03.012. PubMed PMID:  
477 28302571.
- 478 22. Doods H, Hallermayer G, Wu D, Entzeroth M, Rudolf K, Engel W, et al. Pharmacological  
479 profile of BIBN4096BS, the first selective small molecule CGRP antagonist. *Br J Pharmacol*.  
480 2000;129(3):420-3. Epub 2000/03/11. doi: 10.1038/sj.bjp.0703110. PubMed PMID: 10711339;  
481 PubMed Central PMCID: PMCPMC1571877.
- 482 23. Mallee JJ, Salvatore CA, LeBourdelles B, Oliver KR, Longmore J, Koblan KS, et al.  
483 Receptor activity-modifying protein 1 determines the species selectivity of non-peptide CGRP  
484 receptor antagonists. *J Biol Chem*. 2002;277(16):14294-8. Epub 2002/02/16. doi:  
485 10.1074/jbc.M109661200. PubMed PMID: 11847213.
- 486 24. Han D. Association of Serum Levels of Calcitonin Gene-related Peptide and Cytokines  
487 during Migraine Attacks. *Ann Indian Acad Neurol*. 2019;22(3):277-81. Epub 2019/07/31. doi:  
488 10.4103/aian.AIAN\_371\_18. PubMed PMID: 31359937; PubMed Central PMCID:  
489 PMCPMC6613407.
- 490 25. Abobaker A, Darrat M. Letter to the Editor From Abobaker and Darrat: "Circulating  
491 Levels of Calcitonin Gene-Related Peptide Are Lower in COVID-19 Patients". *J Endocr Soc*.

- 492 2021;5(10):bvab052. Epub 2021/08/17. doi: 10.1210/jendso/bvab052. PubMed PMID:  
493 34396020; PubMed Central PMCID: PMCPMC8083661.
- 494 26. Ochoa-Callejero L, Garcia-Sanmartin J, Villoslada-Blanco P, Iniguez M, Perez-Matute P,  
495 Pujadas E, et al. Response to Letter to the Editor from Abobaker and Darrat: "Circulating levels  
496 of Calcitonin Gene-Related Peptide Are Lower in COVID-19 Patients". *J Endocr Soc*.  
497 2021;5(10):bvab053. Epub 2021/08/17. doi: 10.1210/jendso/bvab053. PubMed PMID:  
498 34396021; PubMed Central PMCID: PMCPMC8083267.
- 499 27. Rizzi M, Tonello S, Morani F, Rizzi E, Casciaro GF, Martino E, et al. CGRP Plasma  
500 Levels Correlate with the Clinical Evolution and Prognosis of Hospitalized Acute COVID-19  
501 Patients. *Viruses*. 2022;14(10). Epub 2022/10/28. doi: 10.3390/v14102123. PubMed PMID:  
502 36298678; PubMed Central PMCID: PMCPMC9611580.
- 503 28. Caronna E, Jose Gallardo V, Alpuente A, Torres-Ferrus M, Sanchez-Mateo NM,  
504 Viguera-Romero J, et al. Safety of anti-CGRP monoclonal antibodies in patients with migraine  
505 during the COVID-19 pandemic: Present and future implications. *Neurologia (Engl Ed)*.  
506 2021;36(8):611-7. Epub 2021/10/17. doi: 10.1016/j.nrleng.2021.03.005. PubMed PMID:  
507 34654536; PubMed Central PMCID: PMCPMC8506139.
- 508 29. Grassini A, Marcinno A, Roveta F, Gallo E, Cermelli A, Boschi S, et al. Impact of COVID-  
509 19 on chronic migraine treated with erenumab: a case report. *Neurol Sci*. 2021;42(8):3079-81.  
510 Epub 2021/05/23. doi: 10.1007/s10072-021-05329-5. PubMed PMID: 34021438; PubMed  
511 Central PMCID: PMCPMC8139216.
- 512 30. Ozkan E, Celebi O, Keskin O, Gursoy A, Gursoy-Ozdemir Y. Is Persistent Post-COVID  
513 Headache Associated With Protein-Protein Interactions Between Antibodies Against Viral Spike  
514 Protein and CGRP Receptor?: A Case Report. *Front Pain Res (Lausanne)*. 2022;3:858709.

515 Epub 2022/04/19. doi: 10.3389/fpain.2022.858709. PubMed PMID: 35434707; PubMed Central  
516 PMCID: PMCPMC9011137.

517 31. Littlefield KM, Watson RO, Schneider JM, Neff CP, Yamada E, Zhang M, et al. SARS-  
518 CoV-2-specific T cells associate with inflammation and reduced lung function in pulmonary post-  
519 acute sequelae of SARS-CoV-2. *PLoS Pathog.* 2022;18(5):e1010359. Epub 2022/05/27. doi:  
520 10.1371/journal.ppat.1010359. PubMed PMID: 35617421; PubMed Central PMCID:  
521 PMCPMC9176759.

522 32. Dinnon KH, Leist SR, Okuda K, Dang H, Fritch EJ, Gully KL, et al. A model of persistent  
523 post SARS-CoV-2 induced lung disease for target identification and testing of therapeutic  
524 strategies. *bioRxiv.* 2022. Epub 2022/02/24. doi: 10.1101/2022.02.15.480515. PubMed PMID:  
525 35194605; PubMed Central PMCID: PMCPMC8863140.

526 33. Shapira T, Monreal IA, Dion SP, Buchholz DW, Imbiakha B, Olmstead AD, et al.  
527 A TMPRSS2 inhibitor acts as a pan-SARS-CoV-2 prophylactic and therapeutic. *Nature.*  
528 2022;605(7909):340-8. Epub 2022/03/29. doi: 10.1038/s41586-022-04661-w. PubMed PMID:  
529 35344983; PubMed Central PMCID: PMCPMC9095466 US10988505B2) that cover matriptase  
530 and other type II transmembrane serine proteases inhibitors for treating and preventing viral  
531 infections, respiratory disorders, inflammatory disorders, pain disorders, tissue disorders,  
532 hyperproliferative disorders, and disorders associated with iron overload. The remaining authors  
533 declare that they have no competing interests.

534 34. Achanta R, Shaji A, Smith K, Lucchi A, Fua P, Susstrunk S. SLIC superpixels compared  
535 to state-of-the-art superpixel methods. *IEEE Trans Pattern Anal Mach Intell.* 2012;34(11):2274-  
536 82. Epub 2012/05/30. doi: 10.1109/TPAMI.2012.120. PubMed PMID: 22641706.

537 35. Bankhead P, Loughrey MB, Fernandez JA, Dombrowski Y, McArt DG, Dunne PD, et al.  
538 QuPath: Open source software for digital pathology image analysis. *Sci Rep.* 2017;7(1):16878.

539 Epub 2017/12/06. doi: 10.1038/s41598-017-17204-5. PubMed PMID: 29203879; PubMed  
540 Central PMCID: PMC5715110.

541 36. Shapira T, Monreal IA, Dion SP, Jager M, Desilets A, Olmstead AD, et al. A novel highly  
542 potent inhibitor of TMPRSS2-like proteases blocks SARS-CoV-2 variants of concern and is  
543 broadly protective against infection and mortality in mice. bioRxiv. 2021. Epub 2021/05/12. doi:  
544 10.1101/2021.05.03.442520. PubMed PMID: 33972944; PubMed Central PMCID:  
545 PMCPMC8109206.

546
